# Supplementary material
Source: publisher figshare collection journal article supplement (https://diabetesjournals.figshare.com/articles/dataset/_/25505368)
Supplement: Supplementary file 1 [file 1]

**Supplemental Table S2.** Comparison of glucose metrics between Guardian™ Sensor 3 and Guardian™ 4 Sensor users after 15-day use and 12-month follow-up.

|                             | 15-day use                       |                                  | p-value | 12-month use                     |                                  | p-value |
|-----------------------------|----------------------------------|----------------------------------|---------|----------------------------------|----------------------------------|---------|
|                             | Guardian™<br>Sensor 3<br>(n=248) | Guardian™<br>4 Sensor<br>(n=120) |         | Guardian™<br>Sensor 3<br>(n=248) | Guardian™<br>4 Sensor<br>(n=120) |         |
| TIR (%)                     | 75.9 ± 8.2                       | 74.2 ± 8.9                       | 0.089   | 75.2 ± 8.3                       | 75.7 ± 9.6                       | 0.429   |
| TAR (%)                     | 21.4 ± 9.2                       | 23.4 ± 9.4                       | 0.054   | 22.6 ± 8.9                       | 22.7 ± 10.1                      | 0.727   |
| TAR <sub>Level 1</sub> (%)  | 17.3 ± 6.7                       | 18.4 ± 6.9                       | 0.131   | 17.9 ± 6.1                       | 18 ± 6.5                         | 0.827   |
| TAR <sub>Level 2</sub> (%)  | 4.2 ± 4                          | 5.1 ± 4.6                        | 0.055   | 4.4 ± 3.8                        | 4.7 ± 4.9                        | 0.640   |
| TBR (%)                     | 2.9 ± 2.5                        | 2.1 ± 2.3                        | 0.001*  | 2.5 ± 2.5                        | 1.7 ± 1.8                        | 0.005*  |
| TBR <sub>Level 1</sub> (%)  | 2.3 ± 1.9                        | 1.7 ± 1.7                        | 0.002*  | 2.1 ± 1.8                        | 1.6 ± 1.5                        | 0.021*  |
| TBR <sub>Level 2</sub> (%)  | 0.5 ± 0.8                        | 0.3 ± 0.8                        | 0.005*  | 0.5 ± 0.9                        | 0.3 ± 0.5                        | 0.039*  |
| CV (%)                      | 33.9 ± 4.6                       | 33.5 ± 4.5                       | 0.472   | 34.5 ± 4.9                       | 33.1 ± 5                         | 0.008*  |
| Mean sensor glucose (mg/dl) | 146.5 ± 14                       | 148.9 ± 16.9                     | 0.125   | 146.7 ± 15.9                     | 149.3 ± 18.2                     | 0.213   |
| SD sensor glucose (mg/dl)   | 48.9 ± 9.2                       | 50.2 ± 10.3                      | 0.184   | 50.7 ± 9.6                       | 50 ± 12.1                        | 0.289   |
| GMI (%)                     | 6.8 ± 0.3                        | 6.8 ± 0.3                        | 0.103   | 6.8 ± 0.3                        | 6.8 ± 0.4                        | 0.398   |
| GRI                         | 27.6 ± 10.5                      | 28.1 ± 10.6                      | 0.665   | 28.2 ± 11.1                      | 26.5 ± 11.5                      | 0.126   |

CV: coefficient of variation; GMI: glucose management indicator; GRI: Glycemia Risk Index; SD: standard deviation; TAR: time above range; TBR: time below range; TIR: time in range;

\* significant *p*-value
