# Supplementary material
Source: publisher figshare collection journal article supplement (https://diabetesjournals.figshare.com/articles/dataset/_/25505368)
Supplement: Supplementary file 2 [file 1]

**Supplemental Table S3.** Predictors of longitudinal time in range during 1-year follow-up. Mixed model results are presented as coefficients, standard errors, %95 confidence interval and significant levels.

|                                  | <b>Coefficient</b> | <b>SE</b> | <b>95% CI</b>  | <b><i>p</i>-value</b> |
|----------------------------------|--------------------|-----------|----------------|-----------------------|
| Constant                         | 82.484             | 4.242     | 74.16 – 90.80  | <0.001*               |
| Daily insulin dose/body weight   | 1.655              | 0.626     | 0.43 – 2.88    | 0.008*                |
| % automatic correction boluses   | -0.172             | 0.017     | -0.54 to -0.47 | <0.001*               |
| % SmartGuard use                 | 0.198              | 0.027     | 0.15 – 0.25    | <0.001*               |
| Number of SmartGuard exits       | -0.307             | 0.063     | -0.43 to -0.18 | <0.001*               |
| Number of user-initiated boluses | -0.116             | 0.080     | -0.27 to 0.04  | 0.143                 |
| Daily carbs intake/body weight   | -0.131             | 0.059     | -0.25 to -0.01 | 0.027*                |
| Active insulin time              | -0.029             | 0.024     | -0.08 to 0.02  | 0.235                 |

\* significant *p*-value
