# Supplementary material
Source: publisher figshare collection journal article supplement (https://diabetesjournals.figshare.com/articles/dataset/_/25505368)
Supplement: Supplementary file 3 [file 1]

**Supplemental Table S1.** Differences in glycemic metrics among the four quartiles of automatic correction boluses after 1-year follow-up.

| Automatic correction boluses |                   |                       |                       |                   |                 |
|------------------------------|-------------------|-----------------------|-----------------------|-------------------|-----------------|
|                              | 1st quartile <22% | 2nd quartile 22-29.5% | 3rd quartile 29.5-39% | 4th quartile >39% | <i>p</i> -value |
|                              | ( <i>n</i> =95)   | ( <i>n</i> =88)       | ( <i>n</i> =99)       | ( <i>n</i> =86)   |                 |
| TIR (%)                      | 82 ± 5.9          | 75.7 ± 7.6            | 74.1 ± 7.5            | 68.9 ± 8.5        | <0.001*         |
| TITR (%)                     | 59.3 ± 7.9        | 52 ± 7.7              | 48.7 ± 9.4            | 42.9 ± 8.3        | <0.001*         |
| TAR (%)                      | 14.5 ± 5.9        | 21.4 ± 7.3            | 24.1 ± 7.7            | 30.3 ± 8.6        | <0.001*         |
| TAR <sub>Level 1</sub> (%)   | 12.7 ± 4.6        | 17.1 ± 5.1            | 19.3 ± 5.4            | 23 ± 5.1          | <0.001*         |
| TAR <sub>Level 2</sub> (%)   | 1.8 ± 1.8         | 4.3 ± 3.7             | 4.8 ± 3.6             | 7.4 ± 5           | <0.001*         |
| TBR (%)                      | 3.5 ± 2.7         | 2.9 ± 2.3             | 1.8 ± 1.9             | 1.3 ± 1.4         | <0.001*         |
| TBR <sub>Level 1</sub> (%)   | 2.8 ± 2           | 2.2 ± 1.6             | 1.5 ± 1.4             | 1.1 ± 1.1         | <0.001*         |
| TBR <sub>Level 2</sub> (%)   | 0.7 ± 1           | 0.7 ± 0.9             | 0.3 ± 0.6             | 0.2 ± 0.4         | <0.001*         |
| CV (%)                       | 32.7 ± 4.4        | 34.6 ± 5.3            | 34.4 ± 5.4            | 34.6 ± 4.5        | <0.045          |
| Mean sensor glucose (mg/dl)  | 134 ± 10.7        | 146.4 ± 14.7          | 150 ± 11.4            | 161.7 ± 16.9      | <0.001*         |
| GMI (%)                      | 6.5 ± 0.3         | 6.8 ± 0.3             | 6.9 ± 0.3             | 7.1 ± 0.3         | <0.001*         |
| GRI                          | 22 ± 8.4          | 27.8 ± 10.4           | 27.6 ± 9.7            | 33.9 ± 13.1       | <0.001*         |

CV: coefficient of variation; GMI: glucose management indicator; GRI: Glycemia Risk Index; TAR: time above range; TBR: time below range; TIR: time in range; TITR: time in tight range

\* significant *p*-value
