# Supplementary material
Source: publisher figshare collection journal article supplement (https://diabetesjournals.figshare.com/articles/dataset/_/25505368)
Supplement: Supplementary file 4 [file 1]

*ISPED Diabetes Study Group Collaborators:* Caterina Grosso, Valentino Cherubini, Valentina Tiberi, Elvira Piccinno, Clara Zecchino, Elena Prandi, Maria Rossella Ricciardi, Filomena Stamati, Giuseppe Costanza, Giulia Pezzino, De Marco Rosaria, Anna Bratta, Giordano Spacco, Andrea Rigamonti, Giulio Frontino, Barbara Predieri, Dario Iafusco, Francesco Rosanio, Erica Pozzi, Francesca Cardella, Sara Dal Bo, Chiara Riso.
